# Supplementary material for: A Lexical Representational Mechanism Underlying Verbal Satiation: An Empirical Study With Rarely Used Chinese Characters
Source: Front Psychol. 2019 Oct 2;10:2236. doi: 10.3389/fpsyg.2019.02236 (PMC6783687; doi:10.3389/fpsyg.2019.02236)
Supplement: Supplementary file 1 [file Data_Sheet_1.docx]

Supplementary Material

**Appendix Table A1** Rarely-used Chinese characters and their corresponding matching and mismatching commonly-used characters.

| Rarely-used characters | Matching characters | Mismatching characters |
| --- | --- | --- |
| 殶 | 主 | 业 |
| 几 | 刁 |
| 又 | 丁 |
| 熼 | 火 | 反 |
| 田 | 甘 |
| 共 | 衣 |
| 瑉 | 王 | 支 |
| 民 | 示 |
| 日 | 叉 |
| 蹹 | 足 | 采 |
| 合 | 耳 |
| 羽 | 羊 |
| 塄 | 土 | 寸 |
| 四 | 半 |
| 方 | 夫 |
| 峠 | 山 | 凡 |
| 上 | 工 |
| 下 | 个 |
| 艓 | 舟 | 色 |
| 世 | 本 |
| 木 | 公 |
| 媆 | 女 | 丸 |
| 而 | 舌 |
| 大 | 于 |
| 牎 | 片 | 文 |
| 匆 | 古 |
| 心 | 丰 |
| 砕 | 石 | 乎 |
| 九 | 儿 |
| 十 | 力 |
| 膃 | 月 | 丹 |
| 囚 | 且 |
| 皿 | 令 |
